# Supplementary material for: Mannosylated lipoarabinomannan in serum as a biomarker candidate for subclinical bovine tuberculosis
Source: PubMed Central journal article supplement (PMC4152573; doi:10.1186/1756-0500-7-559), 2014-08-21

## Standard Curve-LAM ELISA

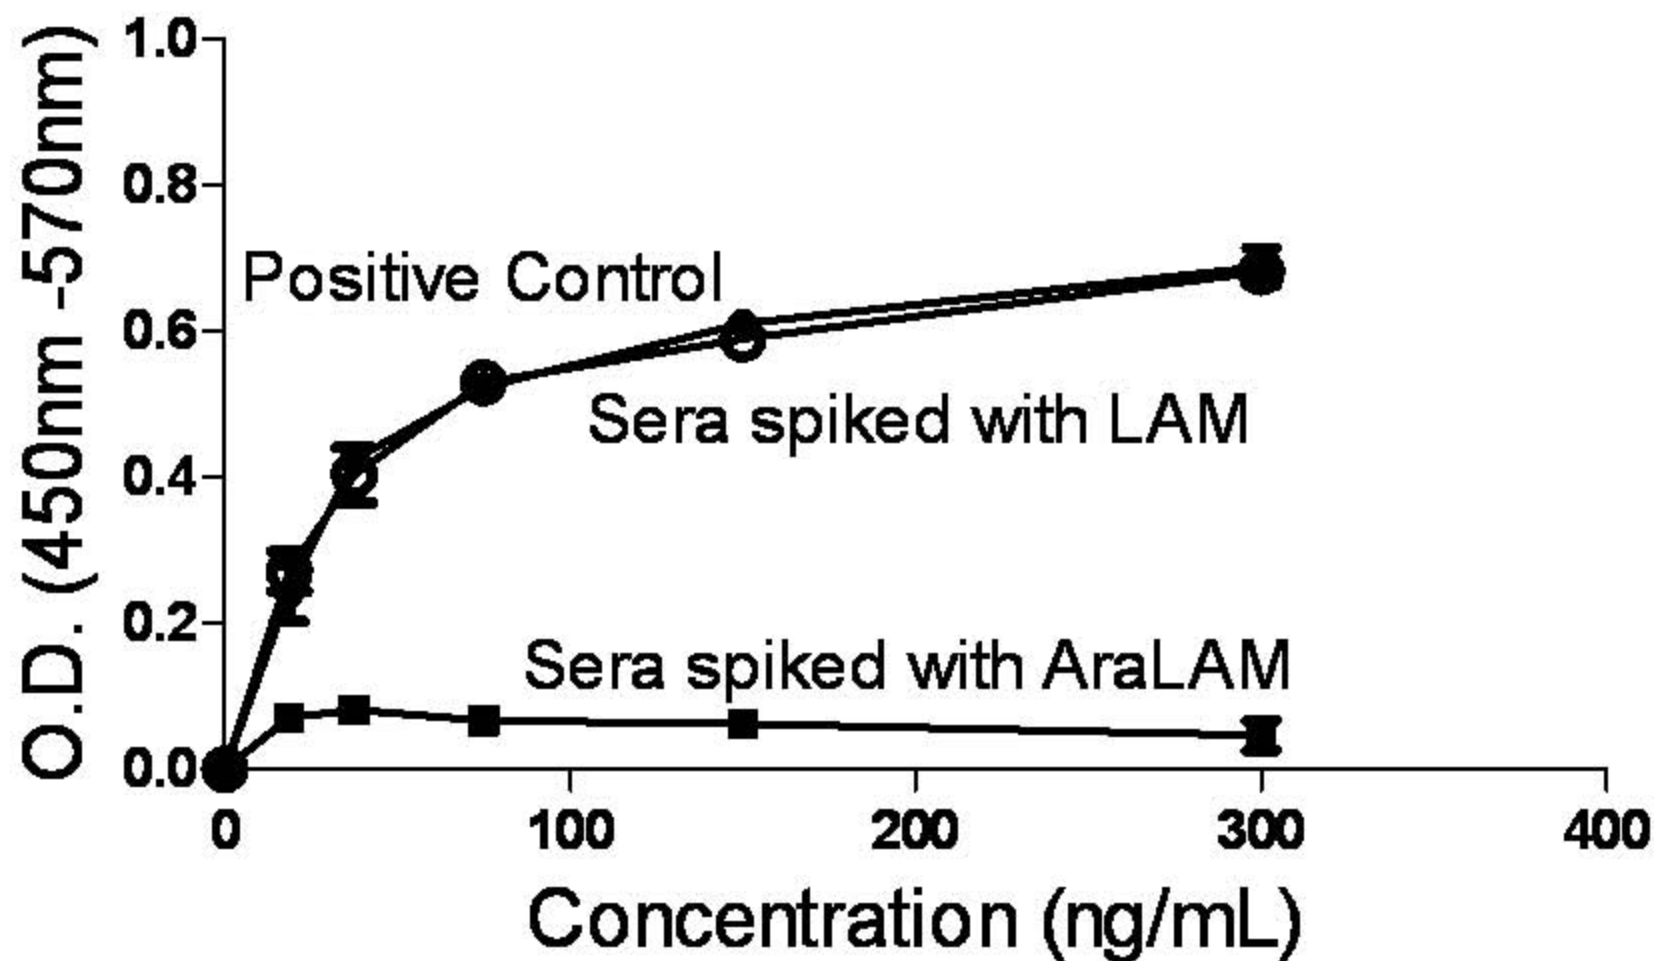

Supplement: 13104_2014_3093_MOESM1_ESM.pdf [file 13104_2014_3093_MOESM1_ESM.pdf]
